# Supplementary material for: K6Li3Sc2B15O30: A new nonlinear optical crystal with a short absorption edge
Source: Royal Society of Chemistry journal article supplement (doi:10.1039/c2ce25304f), 2012-01-01

## Supporting Information

**Table S1 Selected bond distances (Å) and angles (deg) for  $K_6Li_3Sc_2B_{15}O_{30}$**

|                         |          |                                           |            |
|-------------------------|----------|-------------------------------------------|------------|
| K1—O3 <sup>i</sup>      | 2.688(3) | Sc—O2 <sup>vii</sup>                      | 2.056(3)   |
| K1—O3 <sup>ii</sup>     | 2.688(3) | Sc—O2 <sup>ix</sup>                       | 2.056(3)   |
| K1—O2 <sup>iii</sup>    | 2.851(3) | Sc—O2 <sup>x</sup>                        | 2.057(3)   |
| K1—O2 <sup>iv</sup>     | 2.851(3) | Sc—O1 <sup>xi</sup>                       | 2.151(3)   |
| K1—O5 <sup>v</sup>      | 2.930(3) | Sc—O1                                     | 2.151(3)   |
| K1—O5 <sup>vi</sup>     | 2.930(3) | Sc—O1 <sup>iii</sup>                      | 2.151(3)   |
| K2—O2 <sup>iv</sup>     | 2.612(2) | B1—O2                                     | 1.331(5)   |
| K2—O2 <sup>vii</sup>    | 2.612(2) | B1—O5                                     | 1.374(5)   |
| K2—O3                   | 2.888(3) | B1—O4                                     | 1.407(5)   |
| K2—O3 <sup>viii</sup>   | 2.888(3) | B2—O5                                     | 1.459(4)   |
| K2—O4 <sup>iv</sup>     | 2.934(3) | B2—O5 <sup>viii</sup>                     | 1.460(4)   |
| K2—O4 <sup>vii</sup>    | 2.934(3) | B2—O3 <sup>viii</sup>                     | 1.471(5)   |
| Li1—O5 <sup>xviii</sup> | 2.207(3) | B2—O3                                     | 1.471(5)   |
| Li1—O5 <sup>ix</sup>    | 2.207(3) | B3—O1                                     | 1.324(5)   |
| Li1—O5 <sup>xix</sup>   | 2.207(3) | B3—O3                                     | 1.378(5)   |
| Li1—O5 <sup>vii</sup>   | 2.207(3) | B3—O4                                     | 1.407(5)   |
| Li1—O5 <sup>x</sup>     | 2.207(3) | O2—B1—O5                                  | 124.4(4)   |
| Li1—O5 <sup>xx</sup>    | 2.207(3) | O2—B1—O4                                  | 117.4(4)   |
| Li2—O1                  | 2.297(3) | O5—B1—O4                                  | 118.2(3)   |
| Li2—O1 <sup>xii</sup>   | 2.297(3) | O5—B2—O5 <sup>viii</sup>                  | 107.7(4)   |
| Li2—O1 <sup>xiii</sup>  | 2.297(3) | O5—B2—O3 <sup>viii</sup>                  | 108.96(15) |
| Li2—O1 <sup>xi</sup>    | 2.297(3) | O5 <sup>viii</sup> —B2—O3 <sup>viii</sup> | 112.38(15) |
| Li2—O1 <sup>iii</sup>   | 2.297(3) | O5—B2—O3                                  | 112.38(15) |
| Li2—O1 <sup>iv</sup>    | 2.297(3) | O5 <sup>viii</sup> —B2—O3                 | 108.95(15) |
| Li3—O1 <sup>xiii</sup>  | 1.92(3)  | O3 <sup>viii</sup> —B2—O3                 | 106.5(4)   |
| Li3—O1                  | 2.00(2)  | O1—B3—O3                                  | 122.7(4)   |
| Li3—O1 <sup>iv</sup>    | 2.03(3)  | O1—B3—O4                                  | 120.0(4)   |
| Li3—O4                  | 2.43(3)  | O3—B3—O4                                  | 117.3(4)   |

**Symmetry code:** (i)  $1/3+x, y, 5/3-z$ ; (ii)  $-1/3+x, 1/3+y, 1/3+z$ ; (iii)  $1-x+y, 2-x, z$ ; (iv)  $y, x, 2-z$ ; (v)  $1-x, 1-x+y, 2-z$ ; (vi)  $1-y, 1+x-y, z$ ; (vii)  $4/3-y, 2/3+x-y, -1/3+z$ ; (viii)  $4/3-x, 2/3-x+y, 5/3-z$ ; (ix)  $1/3+x, 2/3+y, -1/3+z$ ; (x)  $4/3-x+y, 5/3-x, -1/3+z$ ; (xi)  $2-y, 1+x-y, z$ ; (xii)  $1+x-y, 2-y, 2-z$ ; (xiii)  $2-x, 1-x+y, 2-z$ ; (xiv)  $2/3-x+y, 4/3-x, 1/3+z$ ; (xv)  $-x+y, 1-x, z$ ; (xvi)  $-1/3+x, -2/3+y, 1/3+z$ ; (xvii)  $1/3+x, -1/3+y, -1/3+z$ ; (xviii)  $2/3+y, 1/3+x, 4/3-z$ ; (xix)  $2/3+x-y, 4/3-y, 4/3-z$ ; (xx)  $5/3-x, 4/3-x+y, 4/3-z$ .

**Table S2 Anisotropic displacement parameters ( $\text{\AA}^2$ ) of  $\text{K}_6\text{Li}_3\text{Sc}_2\text{B}_{15}\text{O}_{30}$**

| Atom | $U_{11}$   | $U_{22}$   | $U_{33}$   | $U_{12}$    | $U_{13}$    | $U_{23}$    |
|------|------------|------------|------------|-------------|-------------|-------------|
| K1   | 0.0175(4)  | 0.0126(6)  | 0.0147(5)  | 0.0063(3)   | 0.0005(2)   | 0.0011(5)   |
| K2   | 0.0343(8)  | 0.0219(5)  | 0.0808(11) | 0.0171(4)   | 0.0399(8)   | 0.0199(4)   |
| Sc   | 0.0096(3)  | 0.0096(3)  | 0.0093(5)  | 0.00479(16) | 0.00000     | 0.00000     |
| B1   | 0.014(2)   | 0.0149(18) | 0.015(2)   | 0.0090(17)  | 0.0018(17)  | 0.0003(16)  |
| B2   | 0.014(3)   | 0.0108(19) | 0.010(3)   | 0.0071(13)  | -0.005(2)   | -0.0027(11) |
| B3   | 0.015(2)   | 0.016(2)   | 0.0124(19) | 0.0049(17)  | 0.0030(16)  | -0.0010(15) |
| Li1  | 0.023(6)   | 0.023(6)   | 0.052(13)  | 0.011(3)    | 0.00000     | 0.00000     |
| Li2  | 0.024(15)  | 0.024(15)  | 0.02(2)    | 0.012(7)    | 0.00000     | 0.00000     |
| Li3  | 0.020(14)  | 0.022(13)  | 0.016(12)  | 0.016(12)   | -0.009(10)  | -0.001(9)   |
| O1   | 0.039(2)   | 0.0123(13) | 0.0126(13) | -0.0006(15) | -0.0028(15) | 0.0032(10)  |
| O2   | 0.0138(14) | 0.0117(12) | 0.0163(13) | 0.0060(11)  | -0.0006(10) | 0.0007(10)  |
| O3   | 0.0229(15) | 0.0117(13) | 0.0118(12) | 0.0072(12)  | -0.0001(11) | 0.0007(11)  |
| O4   | 0.0199(16) | 0.0125(13) | 0.0188(12) | -0.0023(12) | -0.0063(12) | 0.0063(10)  |
| O5   | 0.0124(13) | 0.0084(13) | 0.0203(15) | 0.0023(11)  | -0.0041(11) | 0.0031(11)  |

**Fig.S1 XRD patterns before and after melting.**

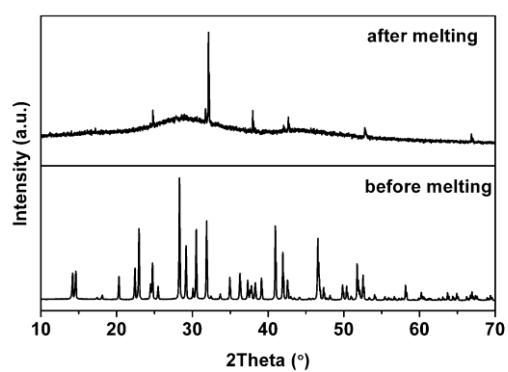

**Fig.S2 The  $\text{K}_6\text{Li}_3\text{Sc}_2\text{B}_{15}\text{O}_{30}$  crystal with the  $\text{K}_2\text{O-Li}_2\text{O-B}_2\text{O}_3$  self-flux**

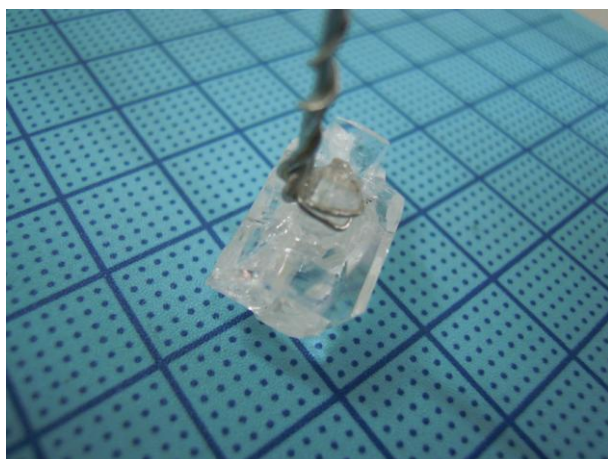

**Fig.S3 View of the linkages of  $B_5O_{10}$  groups and  $ScO_6$  octahedra.**

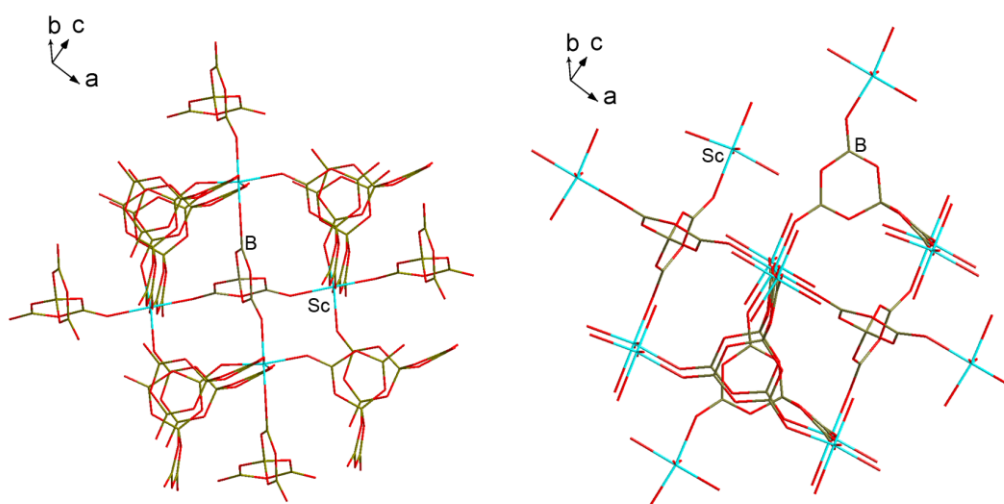

**Fig.S4 View of the 8-membered rings composed of four  $\text{BO}_3$  triangles, two  $\text{BO}_4$  tetrahedra and two  $\text{ScO}_6$  octahedra.**

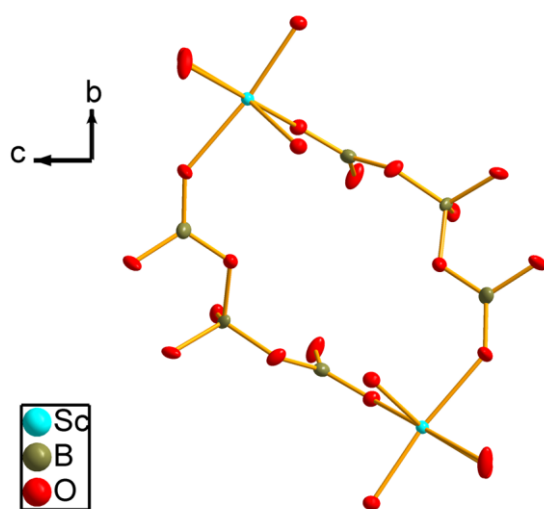

**Fig.S5 Coordination environments of K atoms**

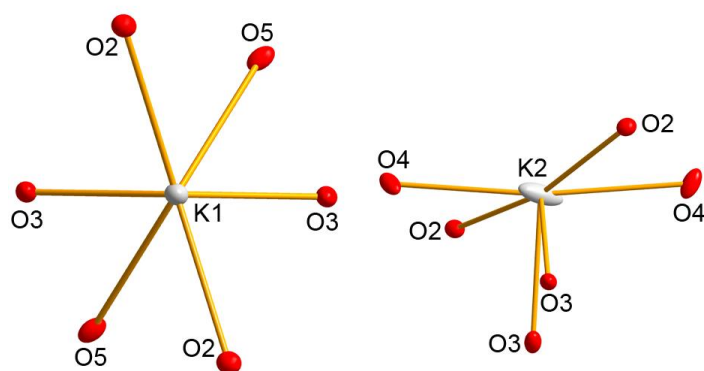

**Fig.S6 Coordination environments of Li atoms**

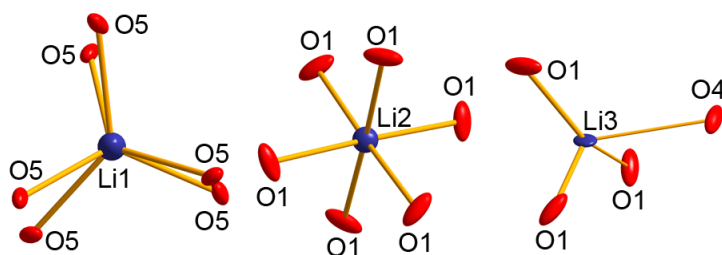



**Fig.S7 SHG measurements on the ground  $K_6Li_3Sc_2B_{15}O_{30}$  crystals**

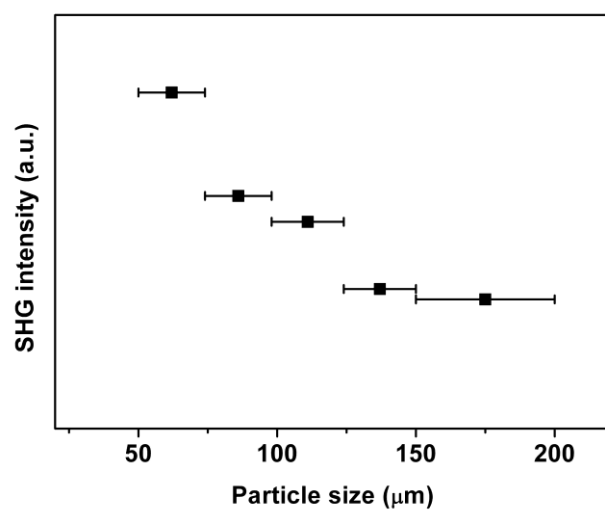

Supplement: c2ce25304f.pdf [file c2ce25304f.pdf]
